# Supplementary material for: KDM5 lysine demethylases are involved in maintenance of 3′UTR length
Source: PubMed Central journal article supplement — Sci Adv. 2016 Nov 18;2(11):e1501662. doi: 10.1126/sciadv.1501662 (PMC5262454; doi:10.1126/sciadv.1501662), 2016-11-18
Supplement: 1501662_SM.pdf [file 1501662_SM.pdf]

## Supplementary Materials for **KDM5 lysine demethylases are involved in maintenance of 3'UTR length**

Lauren P. Blair, Zongzhi Liu, Ramon Lorenzo D. Labitigan, Lizhen Wu, Dinghai Zheng, Zheng Xia, Erica L. Pearson, Fathima I. Nazeer, Jian Cao, Sabine M. Lang, Rachel J. Rines, Samuel G. Mackintosh, Claire L. Moore, Wei Li, Bin Tian, Alan J. Tackett, Qin Yan

Published 18 November 2016, *Sci. Adv.* **2**, e1501662 (2016)

DOI: 10.1126/sciadv.1501662

### **This PDF file includes:**

- fig. S1. Mass spectrometry results.
- fig. S2. Western blot analysis of TAP-tagged proteins.
- fig. S3. Materials for in vitro RNA binding experiments.
- fig. S4. Loss of Jhd2 does not affect processing or polyA-dependent termination in vitro.
- fig. S5. RT-qPCR and Western blot analysis for Jhd2 mRNA and protein used in *PMA1* studies.
- fig. S6. RT-qPCR and Western blot analysis for Jhd2 mRNA and protein used in *KICYC1* studies.
- fig. S7. Metagene plots of H3K4me3 levels.
- Legends for tables S1 to S3
- table S4. Plasmids used in this study.
- table S5. Yeast strains used in this study.
- table S6. Primers used in this study.

### **Other Supplementary Material for this manuscript includes the following:**

(available at [advances.sciencemag.org/cgi/content/full/2/11/e1501662/DC1](http://advances.sciencemag.org/cgi/content/full/2/11/e1501662/DC1))

- table S1 (Microsoft Excel format). Jhd2 bound peaks identified using SICER.
- table S2 (Microsoft Excel format). Pcf11 bound peaks identified using SICER.
- table S3 (Microsoft Excel format). List of genes with APA after Jhd2 deletion.

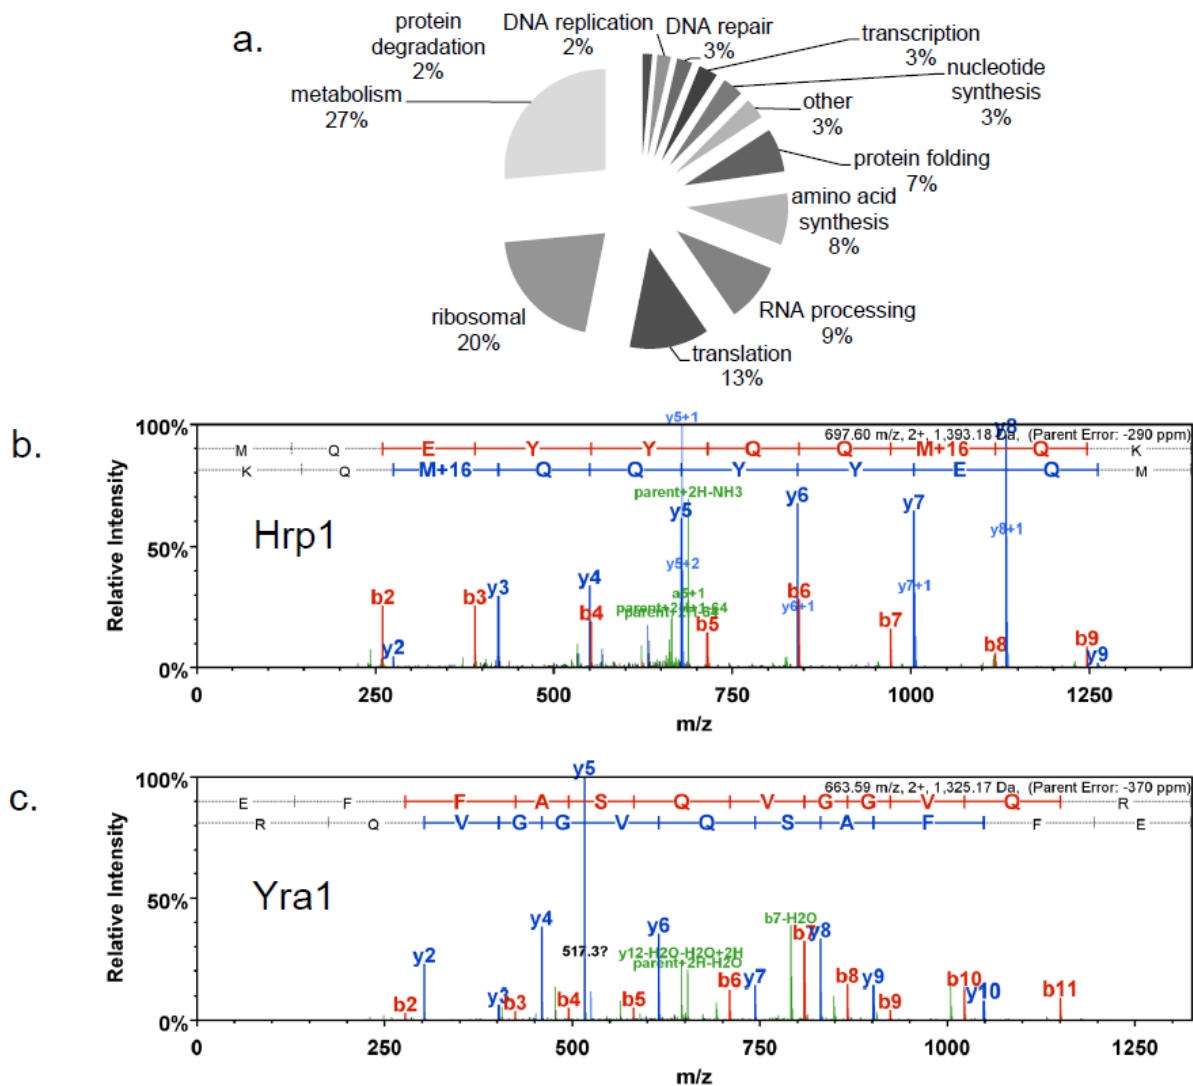

**fig. S1. Mass spectrometry results.** (a) Representation of proteins found in our mass spectrometric analysis of proteins affinity purifying with Jhd2. MS/MS confirmation of Yra1 (b) and Hrp1 (c).

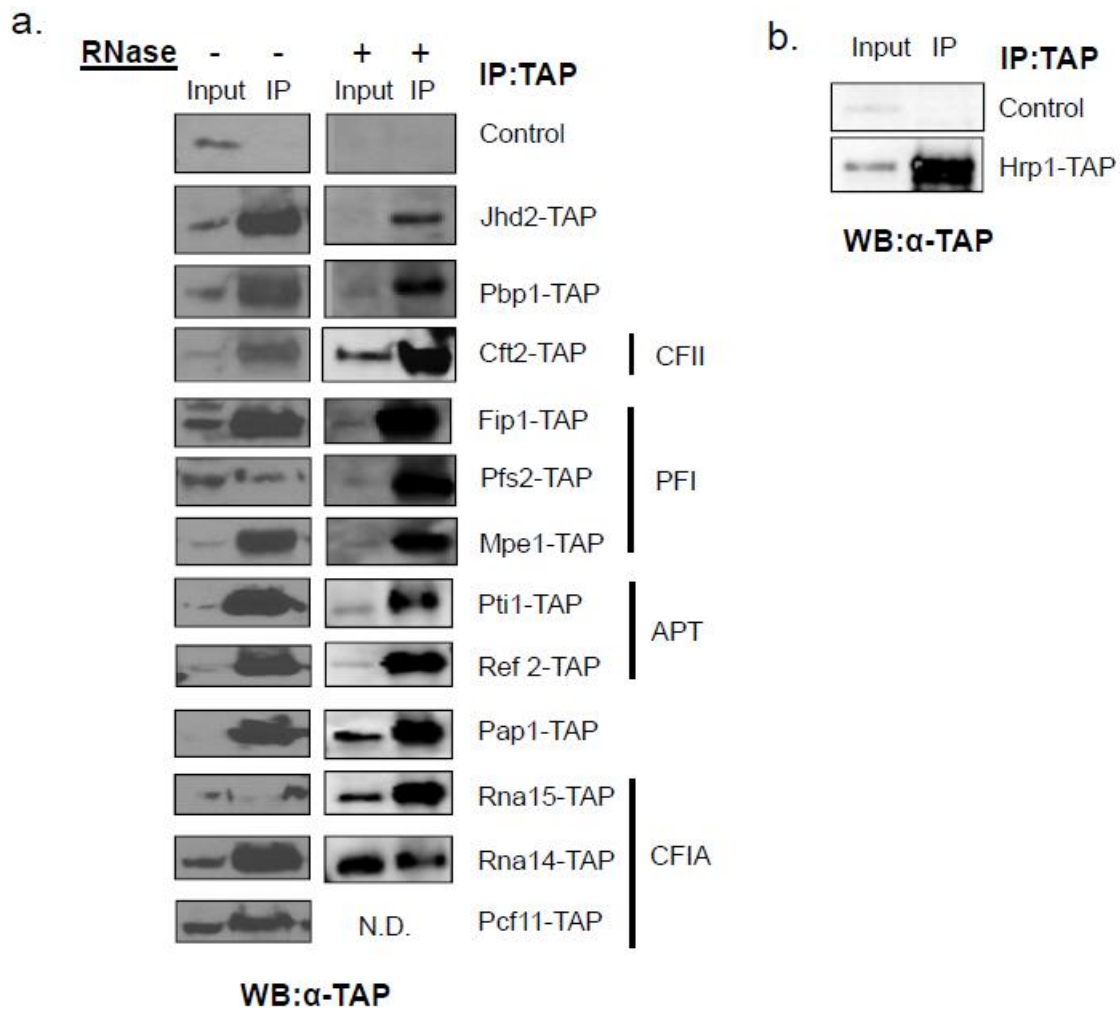

**fig. S2. Western blot analysis of TAP-tagged proteins.** TAP-tagged protein levels of input and co-affinity purifications from (a) TAP-tagged strains overexpressing FLAG-Jhd2 without (left panel) and with (right panel) RNase treatment or (b) Hrp1-TAP or wild-type strains expressing endogenous levels of Jhd2. Membranes were blotted with HRP-conjugated rabbit IgG which recognizes the Protein A portion of the TAP tag. N.D., not determined.

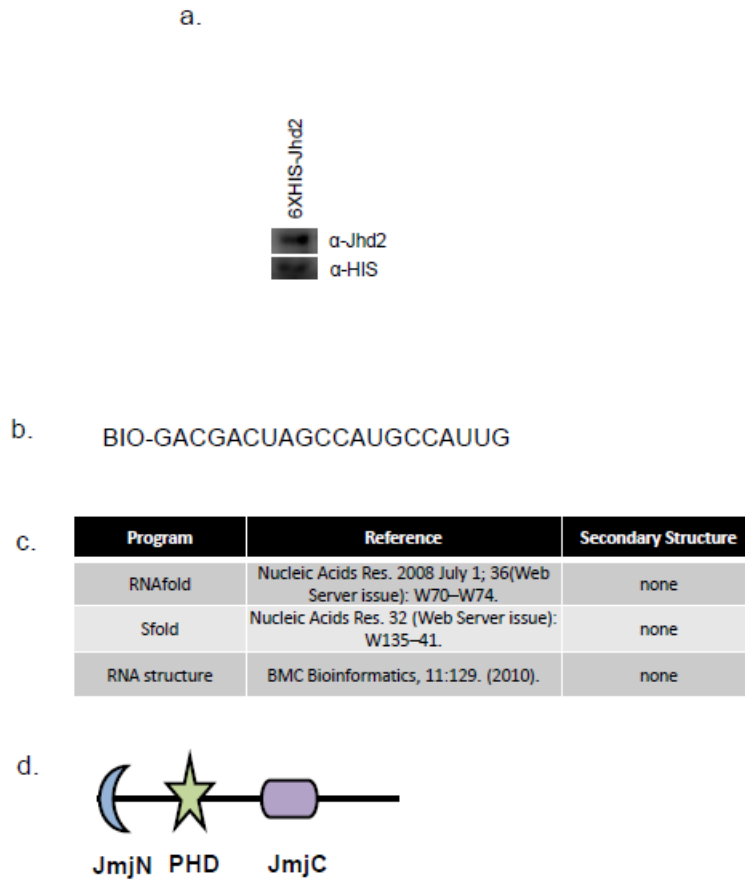

**fig. S3. Materials for in vitro RNA binding experiments.** (a) Verification of recombinant 6xHIS-Jhd2 purification using anti-Jhd2 and anti-HIS antibodies. (b) Sequence of RNA 20-mer used in in vitro RNA binding assays. (c) Three different RNA secondary structure prediction programs show no secondary structure of the random 20-mer. (d) Predicted domain structure of Jhd2 contains a PHD finger, which could bind nucleic acids.

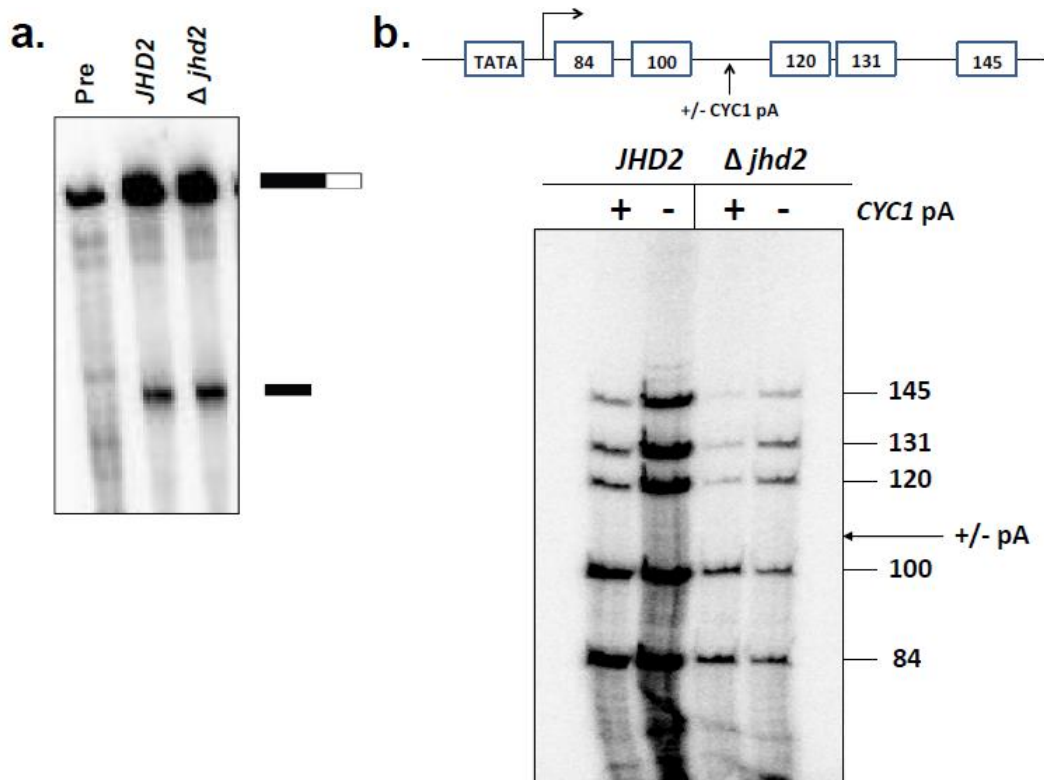

**fig. S4. Loss of Jhd2 does not affect processing or polyA-dependent termination in vitro. (a)**

*In vitro* cleavage reactions with extracts from wild-type cells or *jhd2* deleted cells. Unreacted precursor RNA is shown in the lane marked (Pre), and the positions of precursor and the upstream cleavage product indicated on the right side. The downstream cleavage product is rapidly degraded because it lacks a protective cap structure and is not visible in these reactions.

**(b)** *In vitro* transcription reactions with extracts from wild-type cells or *jhd2* deleted cells and the DNA templates diagrammed at the top of the panel. The signal derived from upstream cassettes (84 and 100 nt) is compared to that from the downstream cassettes (120, 131, and 145 nt) to determine the effect of a polyA site. Regardless of whether the extract was made from cells with or without *JHD2*, less RNA was recovered from cassettes located downstream of the polyA site (lanes marked “+”) compared to that from templates lacking the polyA site (lanes marked “-”).

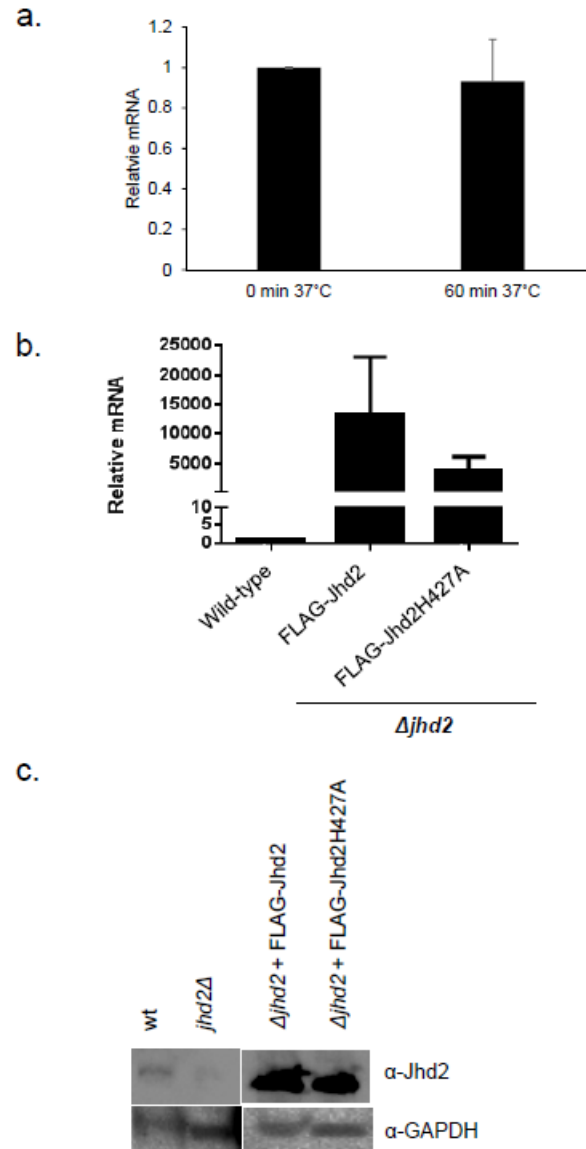

**fig. S5. RT-qPCR and Western blot analysis for Jhd2 mRNA and protein used in *PMA1* studies. Jhd2 mRNA (a, b) and protein (c) levels in the indicated strains.**

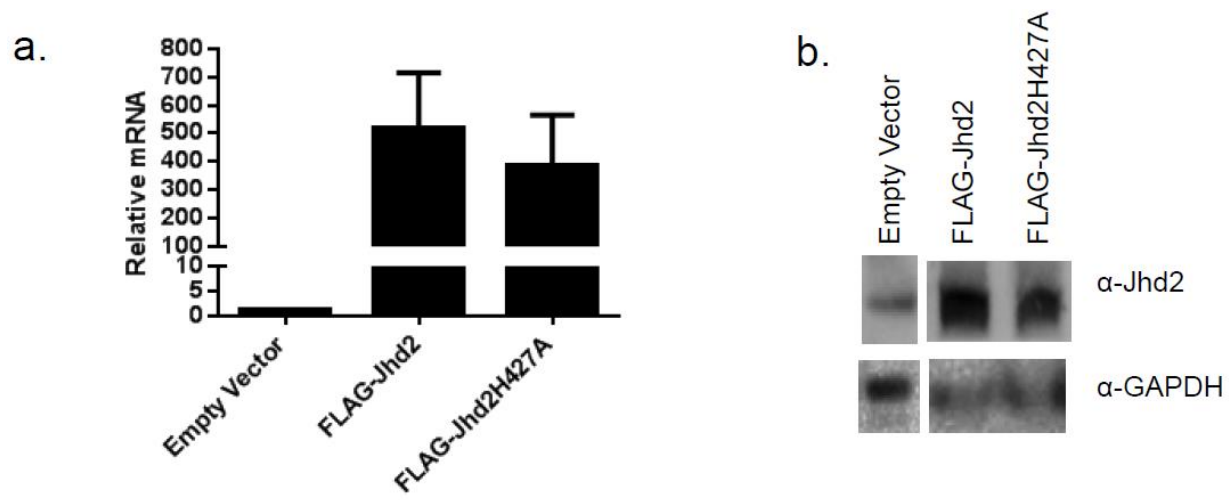

**fig. S6. RT-qPCR and Western blot analysis for Jhd2 mRNA and protein used in *KICYC1* studies. mRNA (a) and protein (b) levels of Jhd2 overexpressing strains.**

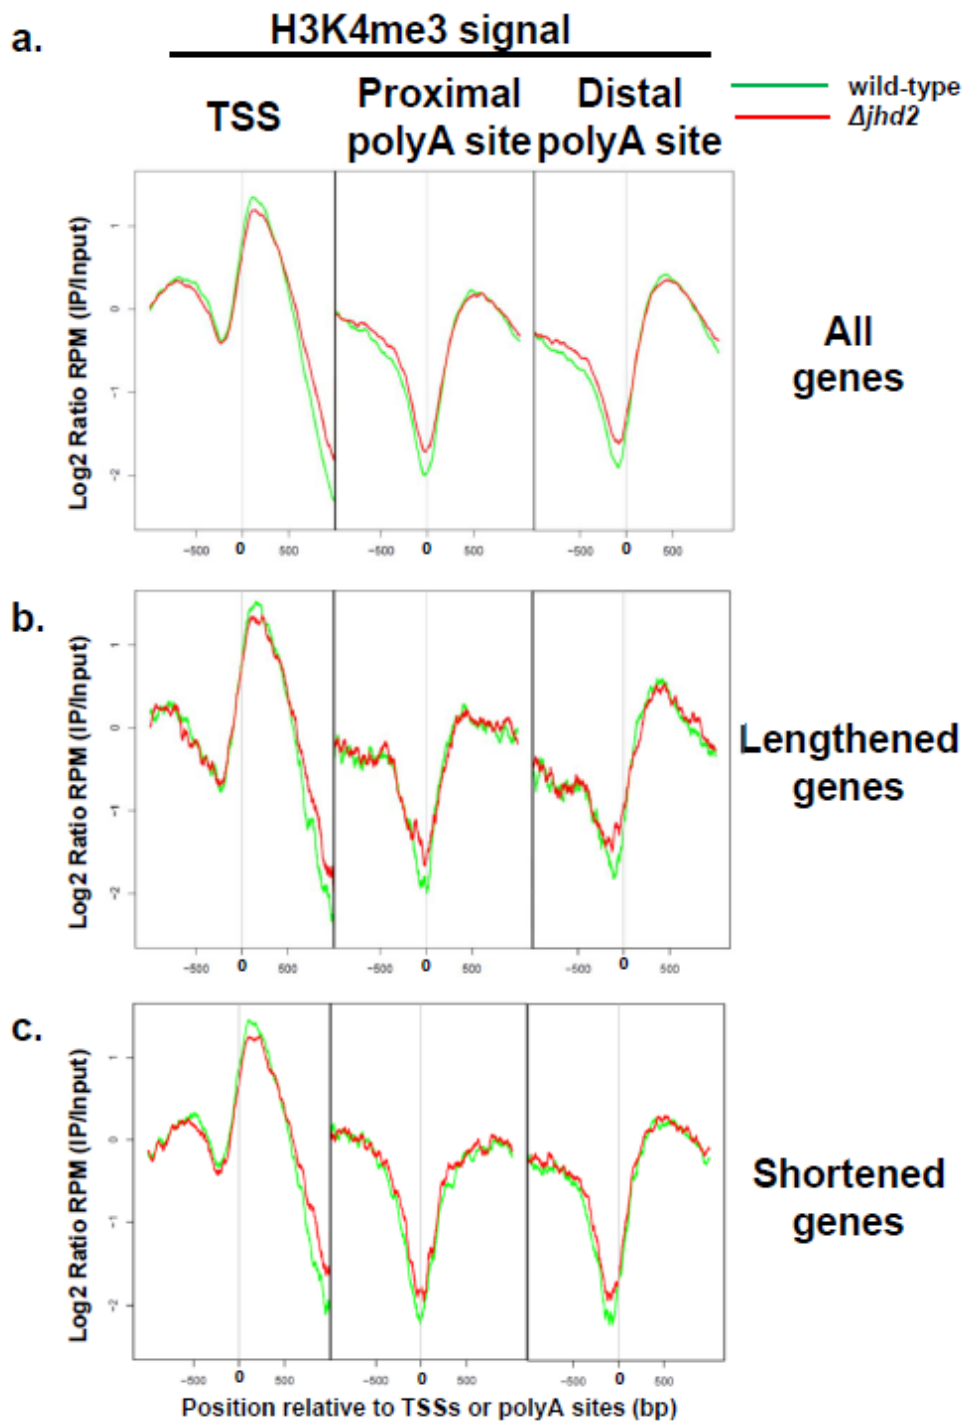



**fig. S7. Metagene plots of H3K4me3 levels.** Metagene plots of H3K4me3 levels near the TSSs (left), proximal polyA sites (middle), or distal polyA sites (right) of (a) all genes, genes showing (b) lengthened transcripts and (c) shortened transcripts. RPM, reads per million mapped reads.

**table S1. Jhd2 bound peaks identified using SICER.** TSS and TTS denote the start and end of ORFs, respectively. Provided as an excel file.

**table S2. Pcf11 bound peaks identified using SICER.** TSS and TTS denote the start and end of ORFs, respectively. Provided as an excel file.

**table S3. List of genes with APA after Jhd2 deletion.** Fold change represents the distal ratio in Jhd2 deletion stain versus that in wild-type strain. Provided as an excel file.

**table S4. Plasmids used in this study.**

| Name   | Description          | Reference                                   |
|--------|----------------------|---------------------------------------------|
| LPB054 | pAD4M                | Nat Struct Mol Biol. 2007 Mar; 14(3):243-5. |
| LPB055 | pAD4M-FLAG-JHD2 (WT) | Nat Struct Mol Biol. 2007 Mar; 14(3):243-5. |
| LPB056 | pAD4M-FLAG-JHD2H427A | Nat Struct Mol Biol. 2007 Mar; 14(3):243-5. |
| LPB057 | KICYC1               | Yeast 2001; 18:1347-1355                    |
| LPB059 | pRSF Duet            | Novagen                                     |
| LPB062 | JHD2 in LPB059       | this study                                  |

**table S5. Yeast strains used in this study.** Plasmids introduced to the yeast strains are listed in table S4.

| Name   | Genotype                                                                       | Reference                                |
|--------|--------------------------------------------------------------------------------|------------------------------------------|
| LBY001 | MATa JHD2::TAP-HIS3 his3Δ1 leu2Δ0 met15Δ0 ura3Δ0                               | Open Biosystems                          |
| LBY017 | MATa PCF11::TAP-HIS3 his3Δ1 leu2Δ0 met15Δ0 ura3Δ0                              | Open Biosystems                          |
| LBY024 | MATa his3Δ1 leu2Δ0 met15Δ0 ura3Δ0                                              | BY4741                                   |
| LBY025 | MATa leu2-3, 112 ura3-52 can1-100 ade2-1 his3-11 trp1-11 bar1Δ                 | Yeast, 2005; 22(1):43-56                 |
| LBY028 | MATa ura3-1 trp1D ade2-1 leu2-3,112 his3-11,15 pcf11-2                         | Mol. Cell. Biol., 1997, 17(3) 1102-1109. |
| LBY029 | MATa jhd2::KAN his3Δ1 leu2Δ0 lys2Δ0 ura3Δ0                                     | Open Biosystems                          |
| LBY038 | MATa his3 Δ 1 leu2Δ0 lys2Δ0 ura3Δ0                                             | BY4742                                   |
| LBY039 | MATa jhd2::KAN his3Δ1 leu2Δ0 lys2Δ0 ura3Δ0 [LPB054]                            | This study                               |
| LBY040 | MATa jhd2::KAN his3Δ1 leu2Δ0 lys2Δ0 ura3Δ0 [LPB055]                            | This study                               |
| LBY041 | MATa jhd2::KAN his3Δ1 leu2Δ0 lys2Δ0 ura3Δ0 [LPB056]                            | This study                               |
| LBY060 | MATa JHD2::TAP-HIS3 his3Δ1 leu2Δ0 met15Δ0 ura3Δ0 [LPB055]                      | This study                               |
| LBY061 | MATa PBP1::TAP-HIS3 his3Δ1 leu2Δ0 met15Δ0 ura3Δ0 [LPB055]                      | This study                               |
| LBY062 | MATa MPE1::TAP-HIS3 his3Δ1 leu2Δ0 met15Δ0 ura3Δ0 [LPB055]                      | This study                               |
| LBY063 | MATa PAP1::TAP-HIS3 his3Δ1 leu2Δ0 met15Δ0 ura3Δ0 [LPB055]                      | This study                               |
| LBY064 | MATa FIP1::TAP-HIS3 his3Δ1 leu2Δ0 met15Δ0 ura3Δ0 [LPB055]                      | This study                               |
| LBY065 | MATa YTH1::TAP-HIS3 his3Δ1 leu2Δ0 met15Δ0 ura3Δ0 [LPB055]                      | This study                               |
| LBY067 | MATa CFT2::TAP-HIS3 his3Δ1 leu2Δ0 met15Δ0 ura3Δ0 [LPB055]                      | This study                               |
| LBY068 | MATa REF2::TAP-HIS3 his3Δ1 leu2Δ0 met15Δ0 ura3Δ0 [LPB055]                      | This study                               |
| LBY069 | MATa RNA14::TAP-HIS3 his3Δ1 leu2Δ0 met15Δ0 ura3Δ0 [LPB055]                     | This study                               |
| LBY070 | MATa PFS2::TAP-HIS3 his3Δ1 leu2Δ0 met15Δ0 ura3Δ0 [LPB055]                      | This study                               |
| LBY071 | MATa RNA15::TAP-HIS3 his3Δ1 leu2Δ0 met15Δ0 ura3Δ0 [LPB055]                     | This study                               |
| LBY072 | MATa PT11::TAP-HIS3 his3Δ1 leu2Δ0 met15Δ0 ura3Δ0 [LPB055]                      | This study                               |
| LBY073 | MATa PCF11::TAP-HIS3 his3Δ1 leu2Δ0 met15Δ0 ura3Δ0 [LPB055]                     | This study                               |
| LBY075 | MATa his3Δ1 leu2Δ0 met15Δ0 ura3Δ0; CLP1::TAP::HIS3MX6                          | Mol. Cell. Biol., 2012, 32(7) 1321-1331. |
| LBY076 | MATa his3Δ1 leu2Δ0 met15Δ0 ura3Δ0; HRP1::TAP::HIS3MX6                          | Mol. Cell. Biol., 2012, 32(7) 1321-1331. |
| LBY081 | MATa leu2-3, 112 ura3-52 can1-100 ade2-1 his3-11 trp1-11 bar1Δ [LPB054+LPB057] | This study                               |
| LBY082 | MATa leu2-3, 112 ura3-52 can1-100 ade2-1 his3-11 trp1-11 bar1Δ [LPB055+LPB057] | This study                               |
| LBY083 | MATa leu2-3, 112 ura3-52 can1-100 ade2-1 his3-11 trp1-11 bar1Δ [LPB056+LPB057] | This study                               |
| LBY090 | MATa ura3-52 his3Δ200 leu2Δ 1 trp1Δ63 met15Δ0 lys2-128 gal10Δ56                | RNA (2007), 13:1756-1764                 |
| LBY091 | MATa ura3-52 his3Δ200 leu2Δ 1 trp1Δ63 met15Δ0 lys2-128 gal10Δ56 [LPB054]       | This study                               |
| LBY092 | MATa ura3-52 his3Δ200 leu2Δ 1 trp1Δ63 met15Δ0 lys2-128 gal10Δ56 [LPB055]       | This study                               |
| LBY093 | MATa ura3-52 his3Δ200 leu2Δ 1 trp1Δ63 met15Δ0 lys2-128 gal10Δ56 [LPB056]       | This study                               |
| LBY094 | MATa his3D1 leu2Δ0 lys2Δ0 ura3Δ0 [LPB054]                                      | This study                               |

**table S6. Primers used in this study.**

| <b>Name</b>  | <b>Reference/Comments</b> | <b>Sequence</b>               |
|--------------|---------------------------|-------------------------------|
| JHD2 F       | this study                | TCGCAAGACAAATGATCCAA          |
| JHD2 R       | this study                | CCGTTTCCGACGATACAAGT          |
| scGAPDH F    | this study                | TCTTCCATCTTCGATGCTTCCGCT      |
| scGAPDH R    | this study                | TAAGCCTTGGCAACGTGTTCAACC      |
| PMA1-1 F     | Mol Cell, 33, 215-226     | TGTATTTCTAATGCGGCACT          |
| PMA1-1 R     | Mol Cell, 33, 215-226     | CCCgAAAGGCATATGGATAACA        |
| PMA1-2 F     | Mol Cell, 33, 215-226     | TCGACGACGAAGACAGTGATA         |
| PMA1-2 R     | Mol Cell, 33, 215-226     | CCGTAAGATGGGTCAGTTTGTAAT      |
| PMA1-4 F     | Mol Cell, 33, 215-226     | ACTGCTCAAAGTGTAGCGA           |
| PMA1-4 R     | Mol Cell, 33, 215-226     | TTCCTTAGCAATACCAACAGCATCA     |
| PMA1-5 F     | Mol Cell, 33, 215-226     | GTCTGGATCTGGTCTATCGG          |
| PMA1-5 R     | Mol Cell, 33, 215-226     | CGTTCATCAATCTGTCAAAGGC        |
| PMA1-6 F     | Mol Cell, 33, 215-226     | GCCGCTTATTTCTACTAGAGTT        |
| PMA1-6 R     | Mol Cell, 33, 215-226     | GGTGTGTGTGTGGATAAAATATTAGAATG |
| PMA1-7 F     | Mol Cell, 33, 215-226     | TGCAAGATGTTTGTATAGAGGGAC      |
| PMA1-7 R     | Mol Cell, 33, 215-226     | ATAGAAGAGCTGGGCAGGA           |
| KICYC-CDS F  | this study                | AACGTCTGTGGGATGAACA           |
| KICYC-CDS R  | this study                | TCGTTTCTGTCCTTTTCTTC          |
| KICYC-3UTR F | this study                | ACACCGTGAGTTTTGCCTTA          |
| KICYC-3UTR R | this study                | TGATCTTTTGATCTTTATGACGAAG     |
| YNL289W 1F   | this study, for CDS       | ATTCTGCTCAAGTCGCCAGT          |
| YNL289W 1R   | this study, for CDS       | GCAGAGTGGGTGTGTAGACG          |
| YNL289W 2F   | this study, for 3'UTR     | TGCAGAAGTTTTCTCTCAGTGG        |
| YNL289W 2R   | this study, for 3'UTR     | CCGGTTCGCACTACGATACT          |
| YHR103W 1F   | this study, for CDS       | GTTCCAGCGAGATGCTTCCTA         |
| YHR103W 1R   | this study, for CDS       | TCCAGCCCTTGACCTTCCTAA         |
| YHR103W 2F   | this study, for 3'UTR     | GTTTCCCAATTGTTGCTGGT          |
| YHR103W 2R   | this study, for 3'UTR     | CCATAAAATTCTCCGCATGT          |
| YHR215W 1F   | this study, for CDS       | GGTGGTTCTGGGCCATACTA          |

|            |                         |                             |
|------------|-------------------------|-----------------------------|
| YHR215W 1R | this study, for CDS     | AAGACAATGCTCCGCTGAAT        |
| YHR215W 2F | this study, for 3'UTR   | TTCCTTGCCTTACTTTTCTTATTATTT |
| YHR215W 2R | this study, for 3'UTR   | AAACAAAATGCGTTTATGACAGTT    |
| hGAPDH F   | JBC, 288:9408-9417      | CGAGATCCCTCCAAAATCAA        |
| hGAPDH R   | JBC, 288:9408-9417      | GTCTTCTGGGTGGCAGTGAT        |
| CCND1 1F   | this study              | AACTACCTGGACCGCTTCCT        |
| CCND1 1R   | this study              | CCACTTGAGCTTGTTACCA         |
| CCND1 2F   | this study              | ACGCTTTGTCTGTCGTGATG        |
| CCND1 2R   | this study              | GTGCAACCAGAAATGCACAG        |
| KDM5B F    | JBC, 288:9408-9417      | CCATAGCCGAGCAGACTGG         |
| KDM5B R    | JBC, 288:9408-9417      | GGATACGTGGCGTAAAATGAAGT     |
| KDM5A F    | Cell Reports 6, 868–877 | CCATAGCCGAGCAGACTGG         |
| KDM5B R    | Cell Reports 6, 868–877 | GGATACGTGGCGTAAAATGAAGT     |
| DICER1 1F  | Nature, 510: 412–416    | CTCATTATGACTTGCTATGTCGCCTTG |
| DICER1 1R  | Nature, 510: 412–416    | CACAATCTCACATGGCTGAGAAG     |
| DICER1 2F  | Nature, 510: 412–416    | TGCTTTCCGCAGTCCTAACTATG     |
| DICER1 2R  | Nature, 510: 412–416    | AATGCCACAGACAAAAATGACC      |
